# Supplementary material for: Ageing of a Poly(vinyl Acetate)-Based White Glue and Its Durability in Contemporary Artworks
Source: Preprints.org preprint supplement (doi:10.20944/preprints202403.0866.v1), 2024-03-17
Supplement: Supplementary file 1 [file supplementary]

Aging of a poly(vinyl acetate)-based white glue and its dura-bility in contemporary artworks

Massimo Lazzari 1,2,*, Thais López Morán 3

|  |
| --- |

1 Departamento de Química Física, Facultade de Química, Universidade de Santiago de Compostela,

Avenida das Ciencias s/n, 15782 Santiago de Compostela, Spain;

2 Centro Singular de Investigación en Química Biolóxica e Materiais Moleculares (CiQUS), Universidade de Santiago de Compostela, 15782 Santiago de Compostela, Spain;

3 Centro Galego de Arte Contemporánea (CGAC), R. de Ramón del Valle-Inclán 2, 15703 Santiago de Compostela, Spain; cgac.conservacion@xunta.gal

***** Correspondence: massimo.lazzari@usc.es

**Supplementary Materials**: Figure S1: Photograph of *Palette* (from the portfolio *For Joseph Beuys*) by Tony Cragg; Figure S2: Detail of *Palette* and photographs of detached debris; Figure S3: Photograph of *Tierra, ladrillo y agua I, II, III e IV* by Dario Villalba; Figure S4: Details of the Villalba’s artwork, also showing glue accumulation and detachments; Figure S5: DSC thermogram of Villalba’s white glue fragment; Table S1: Evolution of the CIELAB coordinates of dried commercial glue films exposed to isothermal aging at 130ºC.


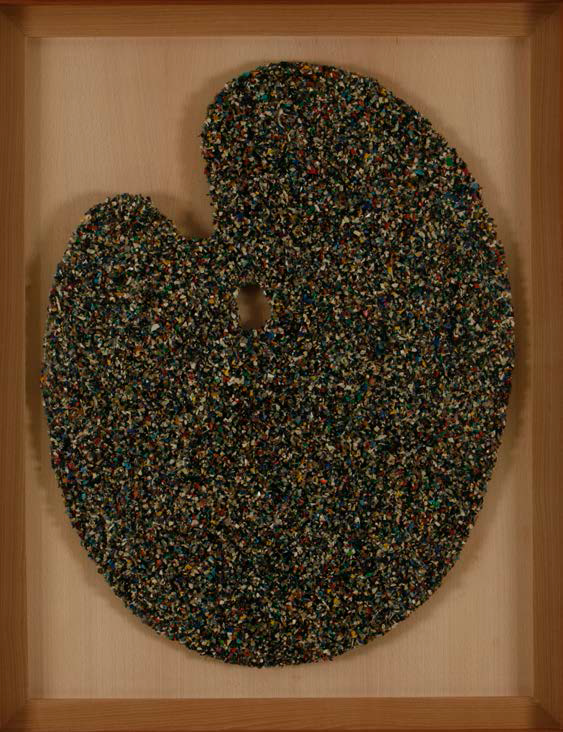


**Figure S1**. Photograph of *Palette* (from the portfolio *For Joseph Beuys*) by Tony Cragg (artwork of the permanent collection of the Centro Galego de Arte Contemporánea, CGAC).


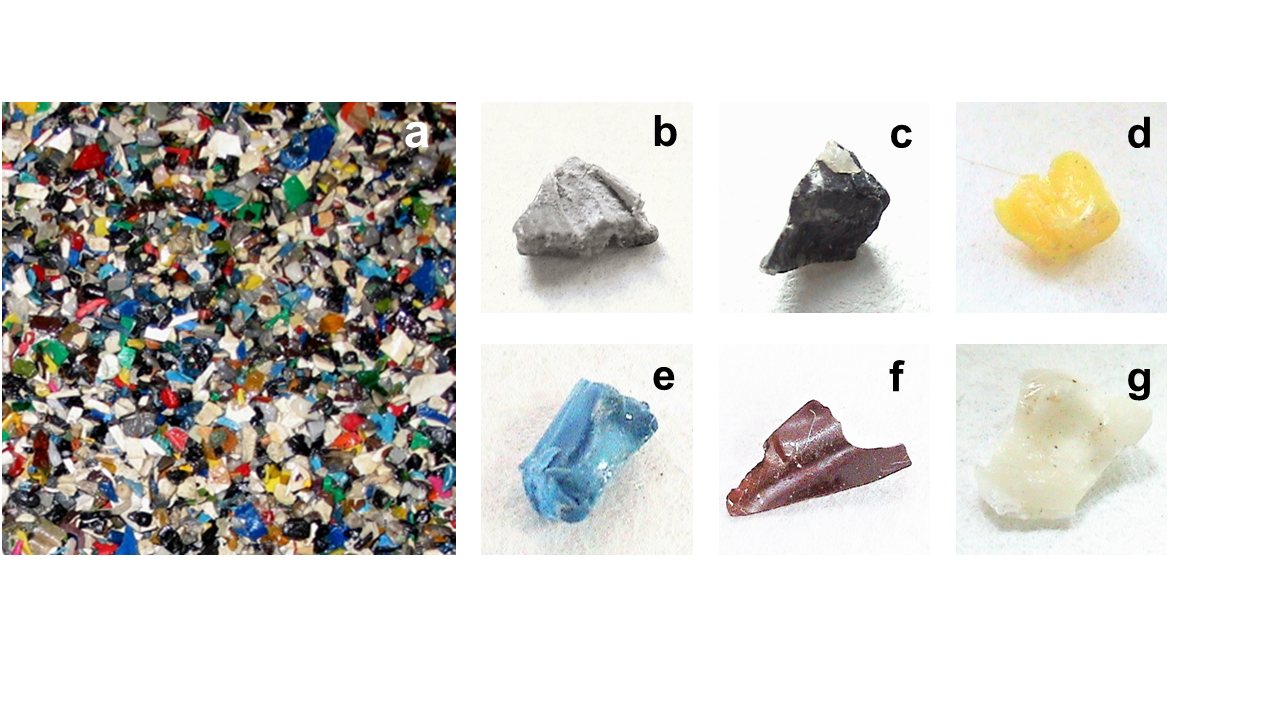


**Figure S2**. Detail of *Palette* (a) and photographs of detached debris (b-g).

**
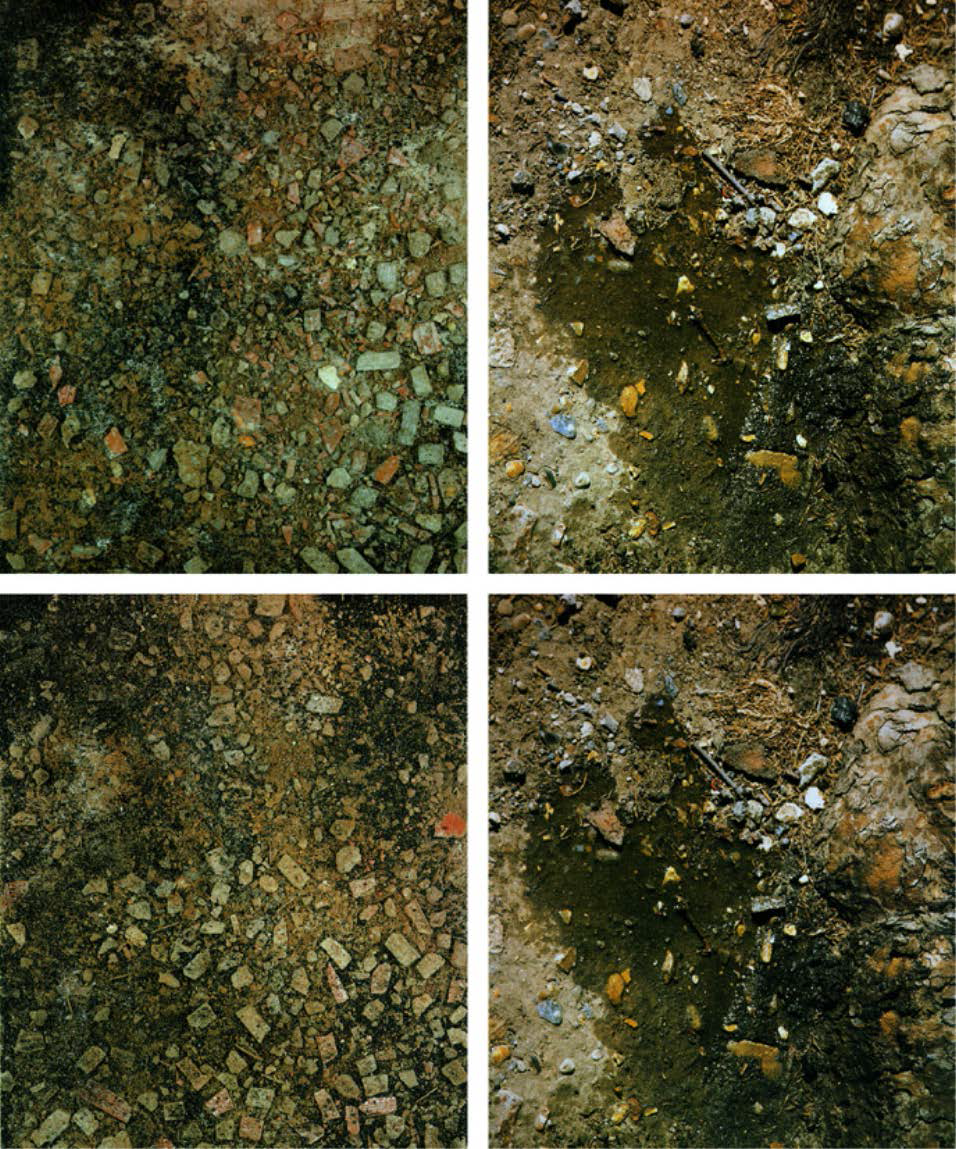
**

**Figure S3**. Photograph of *Tierra, ladrillo y agua I, II, III e IV* by Dario Villalba(artwork by the Centro Galego de Arte Contemporánea, CGAC).


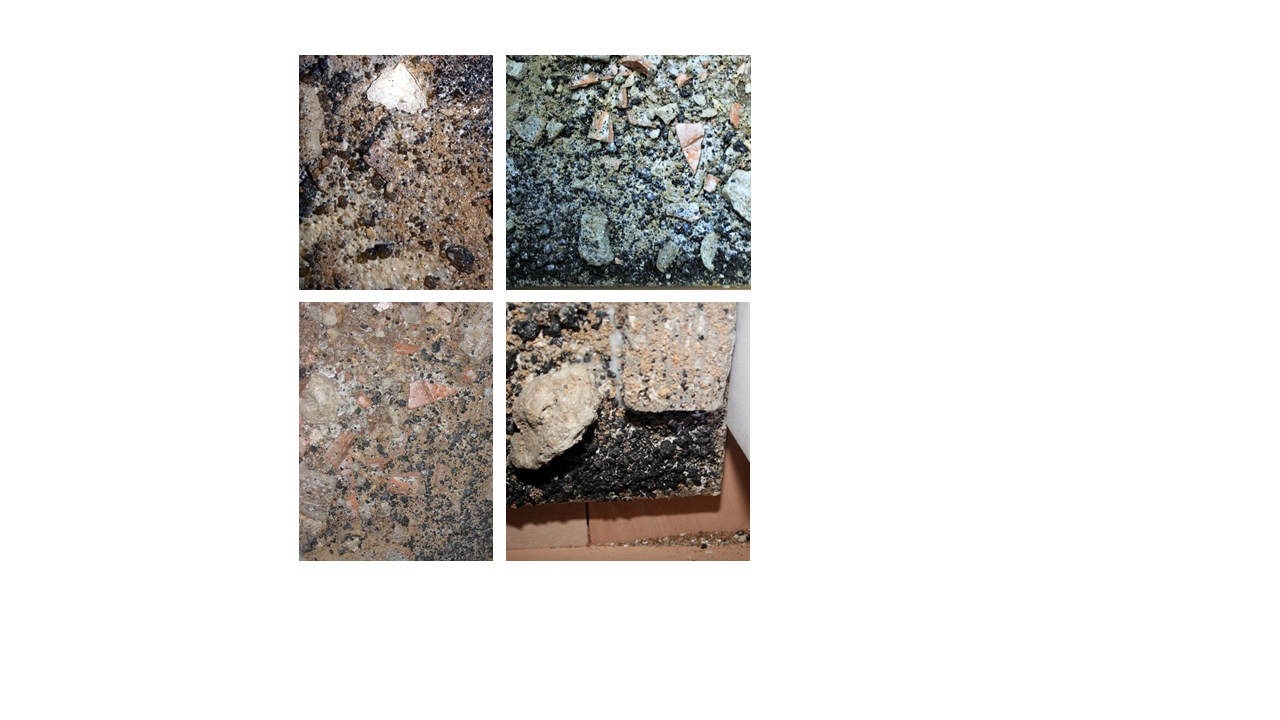


**Figure S4**. Details of the Villalba’s artwork, also showing glue accumulation and detachments.


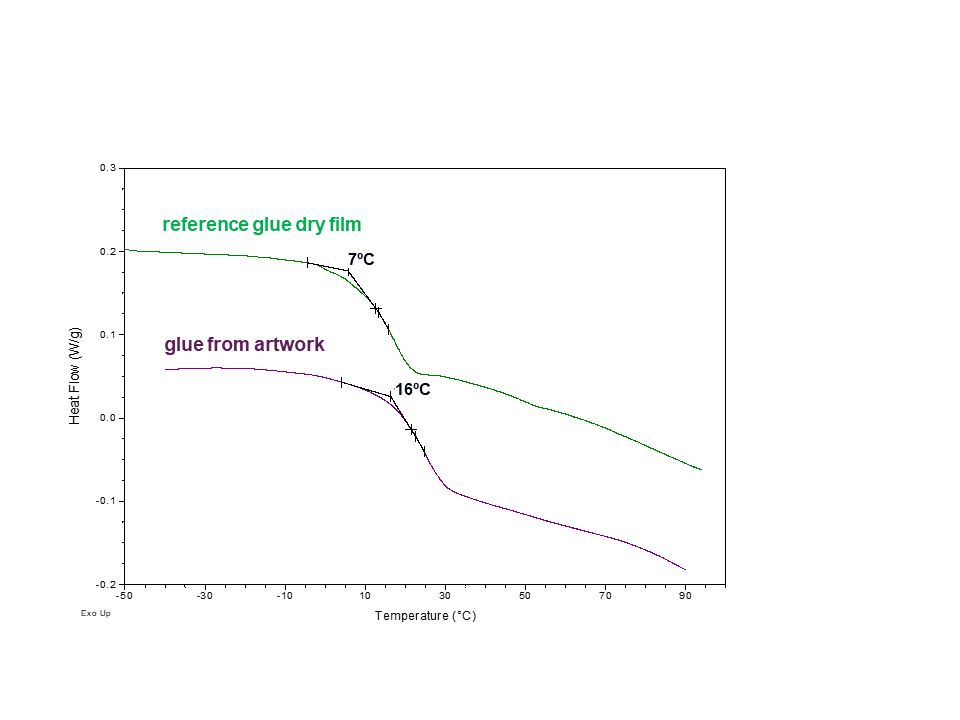


**Figure S5**. DSC thermogram of Villalba’s white glue fragment.

**Table S1**. Evolution of the CIELAB coordinates of dried commercial glue films exposed to isothermal aging at 130ºC.

| Time (h) | ΔL* | Δa* | Δb* | ΔE |
| --- | --- | --- | --- | --- |
| 24 | ‐5.52 | ‐9.98 | 15.43 | 19.19 |
| 72 | ‐10.89 | ‐9.54 | 18.82 | 23.74 |
| 120 | ‐21.39 | ‐9.89 | 25.00 | 34.36 |
| 240 | ‐25.61 | ‐8.48 | 29.84 | 40.23 |
| 550 | ‐29.58 | ‐8.87 | 32.41 | 44.77 |
